# Supplementary material for: Ecological Assessment of Clinicians’ Antipsychotic Prescription Habits in Psychiatric Inpatients: A Novel Web- and Mobile Phone–Based Prototype for a Dynamic Clinical Decision Support System
Source: PubMed Central journal article supplement (PMC5301080; doi:10.2196/jmir.5954), 2017-01-26
Supplement: jmir_v19i1e25_app1.pdf [file jmir_v19i1e25_app1.pdf]

Supplementary Material 1: Proportion of antipsychotic polypharmacy compared with monotherapy

| <b>Drug</b>              | <b>ATC code</b> | <b>Total prescriptions</b> | <b>Monotherapy Percentage (n)</b> | <b>Politherapy Percentage (n)</b> |
|--------------------------|-----------------|----------------------------|-----------------------------------|-----------------------------------|
| Amisulpride              | N05AL05         | 17                         | 29.4% (5)                         | 70.6% (12)                        |
| Aripiprazole             | N05AX12         | 37                         | 67.6% (25)                        | 32.4% (12)                        |
| Asenapine                | N05AH05         | 25                         | 72 % (18)                         | 28%5 (7)                          |
| Clotiapine               | N05AH06         | 11                         | 18.2% (2)                         | 81.8% (9)                         |
| Clozapine                | N05AH02         | 11                         | 18.2% (2)                         | 81.8% (9)                         |
| Fluphenazine             | N05AB02         | 3                          | 0                                 | 100% (3)                          |
| Haloperidol              | N05AD01         | 7                          | 28.6% (2)                         | 71.4% (5)                         |
| Levomepromazine          | N05AA01         | 3                          | 33.3% (1)                         | 66.7% (2)                         |
| Olanzapine               | N05AH03         | 36                         | 52.8% (19)                        | 47.2% (17)                        |
| Paliperidone             | N05AX13         | 22                         | 59.1% (13)                        | 40.9% (9)                         |
| Long-acting paliperidone | N05AX13         | 63                         | 42.9% (27)                        | 57.1% (36)                        |
| Quetiapine               | N05AH04         | 38                         | 50% (19)                          | 50% (19)                          |
| Risperidone              | N05AX08         | 66                         | 57.6% (38)                        | 42.4% (28)                        |
| Long-acting risperidone  | N05AX08         | 1                          | 0                                 | 100% (1)                          |
| Tiapride                 | N05AL03         | 10                         | 70% (7)                           | 30% (3)                           |
| Ziprasidone              | N05AE04         | 1                          | 0                                 | 100% (1)                          |
| Zuclopenthixol acufase   | N05AF05         | 2                          | 0                                 | 100% (2)                          |
| Zuclopenthixol depot     | N05AF05         | 12                         | 16.7% (2)                         | 83.3% (10)                        |
| Total                    |                 | 365                        | 180                               | 185                               |
